# Supplementary material
Source: PubMed Central journal article supplement (PMC7995738)
Supplement: NIHMS1673898-supplement-2.pdf [file NIHMS1673898-supplement-2.pdf]

**Supplemental Table S1. PCR Primers**

|                                                                                                                                                                                                                              |                                                                                                                                                                                                                                                                                                                                                                                                                                                                                                                                                                                                                                                                                                                                                                                                                                                                           |
|------------------------------------------------------------------------------------------------------------------------------------------------------------------------------------------------------------------------------|---------------------------------------------------------------------------------------------------------------------------------------------------------------------------------------------------------------------------------------------------------------------------------------------------------------------------------------------------------------------------------------------------------------------------------------------------------------------------------------------------------------------------------------------------------------------------------------------------------------------------------------------------------------------------------------------------------------------------------------------------------------------------------------------------------------------------------------------------------------------------|
| <p><b>Genetic manipulations</b></p> <p>rPRL transgene</p> <p><i>Apc</i><sup>Min</sup> germline mutation</p> <p><i>Apc</i> hotspot region (aa 1512-1579), sequencing tags in bold</p>                                         | <p>5' CCTCCTCATTCTCTGCTCTTC 3'<br/>5' CCAATCACCTTGCTCTAAACCC 3'</p> <p>5' TGAGAAAGACAGAAGTTA 3'<br/>5' TTCCACTTTGGCATAAGGC 3'<br/>Internal control, 5'GCCATCCCTTCACGTTAG</p> <p>5' <b>GTT TTC CCA GTC ACG ACC</b> CAA GCA GAA<br/>GCA AAA CCC C 3'<br/>5' <b>CAG GAA ACA GCT ATG ACC</b> CTC GCT GAG<br/>CAT CAT CTG T 3'</p>                                                                                                                                                                                                                                                                                                                                                                                                                                                                                                                                             |
| <p><b>qRT-PCR</b></p> <p><i>18S</i></p> <p><i>Axin2</i></p> <p><i>Ccnd1</i></p> <p><i>Ccne1</i></p> <p><i>Cdkn2c</i></p> <p><i>Hes1</i></p> <p><i>Hey1</i></p> <p><i>Nrarp</i></p> <p><i>Notch1</i></p> <p><i>Notch2</i></p> | <p>F, 5' CGC CGC TAG AGG TGA ATT TCT 3'<br/>R, 5' CGA ACC TCC GAC TTT CGT TCT 3'</p> <p>F, 5' CCA GGC TGG AGA AAC TGA AAC T 3'<br/>R, 5' CCT GCT CAG ACC CCT CCT TT 3'</p> <p>F, 5' CAT CAA GTG TGA CCC GGA CTG 3'<br/>R, 5' CCT CCT CCT CAG TGG CCT TG 3'</p> <p>F, 5' GCC AAG ATT GAC AAG ACT GTG AAA 3'<br/>R, 5' GGT CCA CGC ATG CTG AAT TA 3'</p> <p>F, 5' CAA CGC CCC GAA CTC TTT C 3'<br/>R, 5' AGC AGA AGA GCT GCT ACG TGA A 3'</p> <p>F, 5' TAC CCC AGC CAG TGT CAA CA 3'<br/>R, 5' CCT TCG CCT CTT CTC CAT GA 3'</p> <p>F, 5' GGT ACC CAG TGC CTT TGA GA 3'<br/>R, 5' GGC GTG CGC GTC AAA ATA A 3'</p> <p>F, 5' CCA GCG TTG TGA AGG CTG TT 3'<br/>R, 5' GCA GCC CTT CCA CTC ATT CA 3'</p> <p>F, 5' ACA ACA ACG AGT GTG AGT CC 3'<br/>R, 5' ACA CGT GGC TCC TGT ATA TG 3'</p> <p>F, 5' TAC CTA CCA CAA CGG CAC AG 3'<br/>R, 5' TCT CAC AGG GGT CTC GAT GT 3'</p> |

|               |                                                                                   |
|---------------|-----------------------------------------------------------------------------------|
| <i>Notch3</i> | F, 5' AGA TCA ATG AGT GTG CAT CC 3'<br>R, 5' GCA GAC TCC ATG ACT ACA GG 3'        |
| <i>Notch4</i> | F, 5' AAT GGG GGT ACC TGT GTG AA 3'<br>R, 5' GTA TAG CCA GGG CTG CAG AG 3'        |
| <i>Sox2</i>   | F, 5' CCA CCA ATC CCA TCC AAA TT 3'<br>R, 5' CAA AAA GAA GTC CCA AGA TCT CTC A 3' |
| <i>Sox9</i>   | F, 5' CGA GCA CTC TGG GCA ATC TC 3'<br>R, 5' CCT CTC GCT TCA GAT CAA CTT TG 3'    |
| <i>Tcf4</i>   | F, 5' CCT CGT CAT CTC CCA ATT ATG AA 3'<br>R, 5' GTC TTT CCA AAC GGT CTT CGA T 3' |

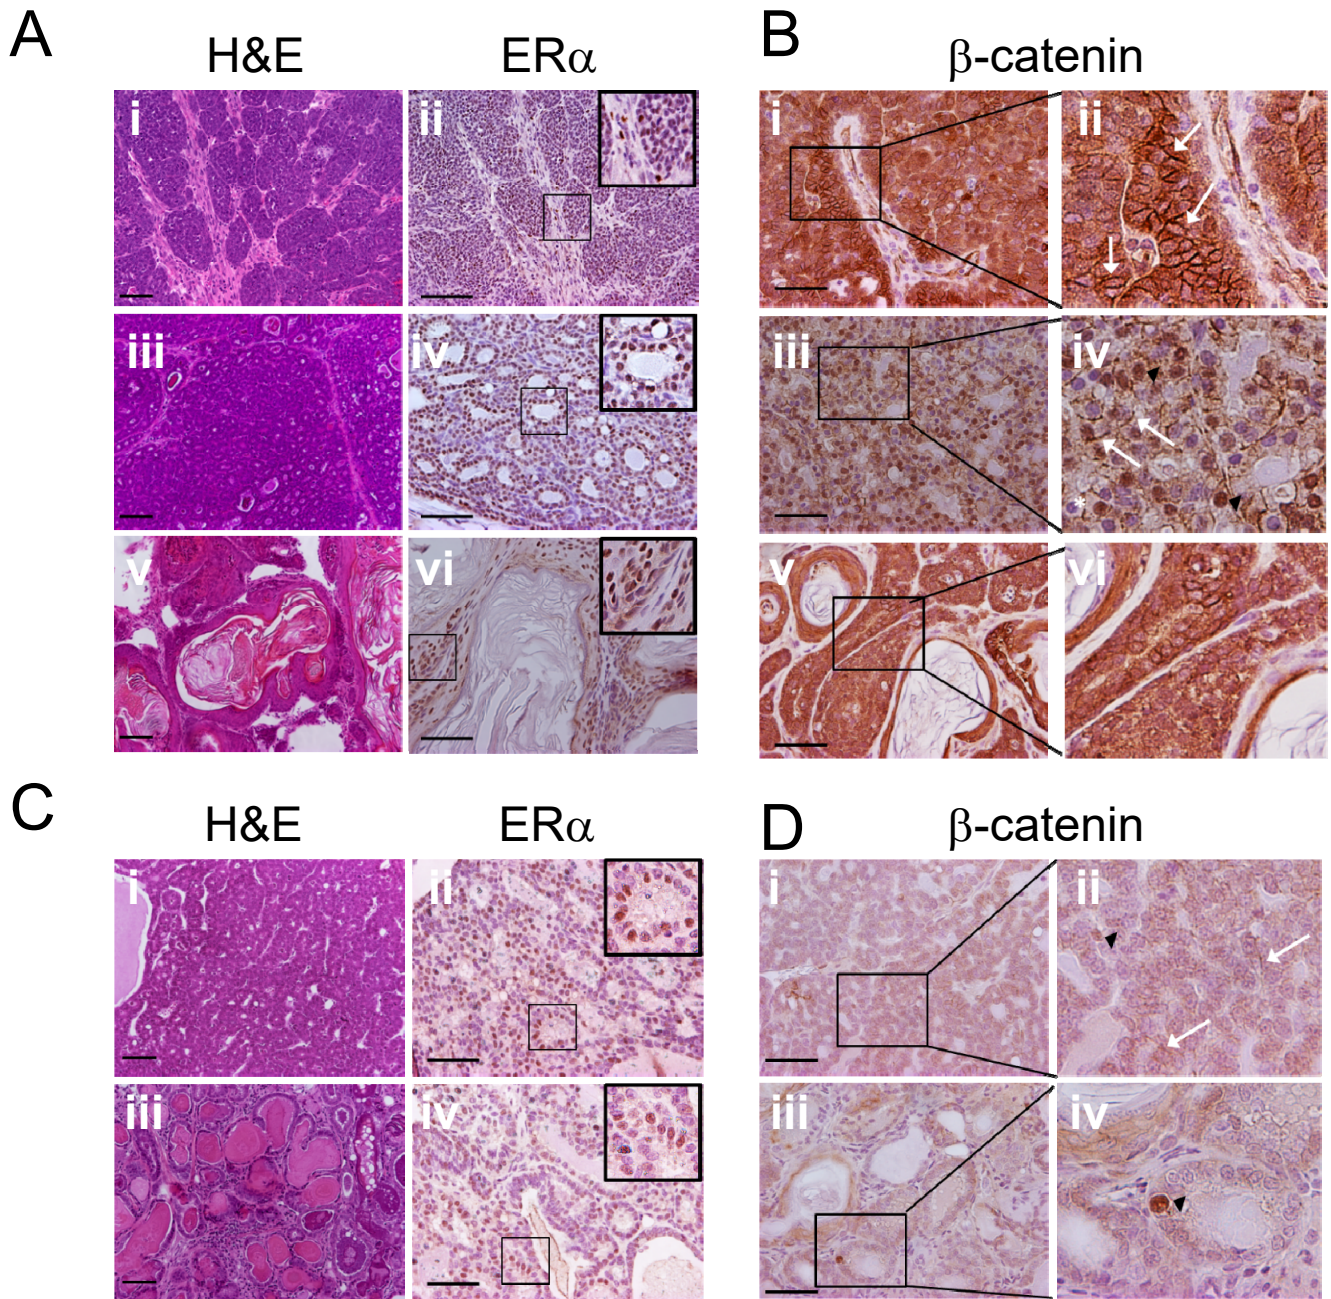

**Suppl. Fig. S1. Tumors from *Apc<sup>Min/+</sup>* (A,B) and NRL-PRL (C,D) females.** (A) *Apc<sup>Min/+</sup>* tumors. Left, hematoxylin and eosin (H&E) stained representative histotypes (i, ii, glandular; iii, iv, microacinar; v, vi, adenosquamous). Right, ER $\alpha$  expression by immunohistochemistry; insets as shown. (B) Tumors from *Apc<sup>Min/+</sup>* females exhibited heterogeneous cellular localization of  $\beta$ -catenin; insets as shown. (i, ii, glandular; iii, iv, microacinar; v, vi, adenosquamous). (C) Tumors from NRL-PRL females. Left, H&E stained histotypes (i, ii, glandular; iii, iv, papillary). Right, ER $\alpha$  expression by immunohistochemistry; insets as shown. (D) Tumors that developed NRL-PRL females exhibited lower  $\beta$ -catenin expression compared to tumors from *Apc<sup>Min/+</sup>* and NRL-PRL/*Apc<sup>Min/+</sup>* females; insets as shown. (i, ii, glandular; iii, iv, papillary). White arrows indicate membrane  $\beta$ -catenin, black arrowheads indicate nuclear  $\beta$ -catenin, and white asterisk shows cell with negligible detectable  $\beta$ -catenin. Scale bars, 100  $\mu$ m. Original magnifications, H&E, x100;  $\beta$ -catenin, ER $\alpha$ , x200.

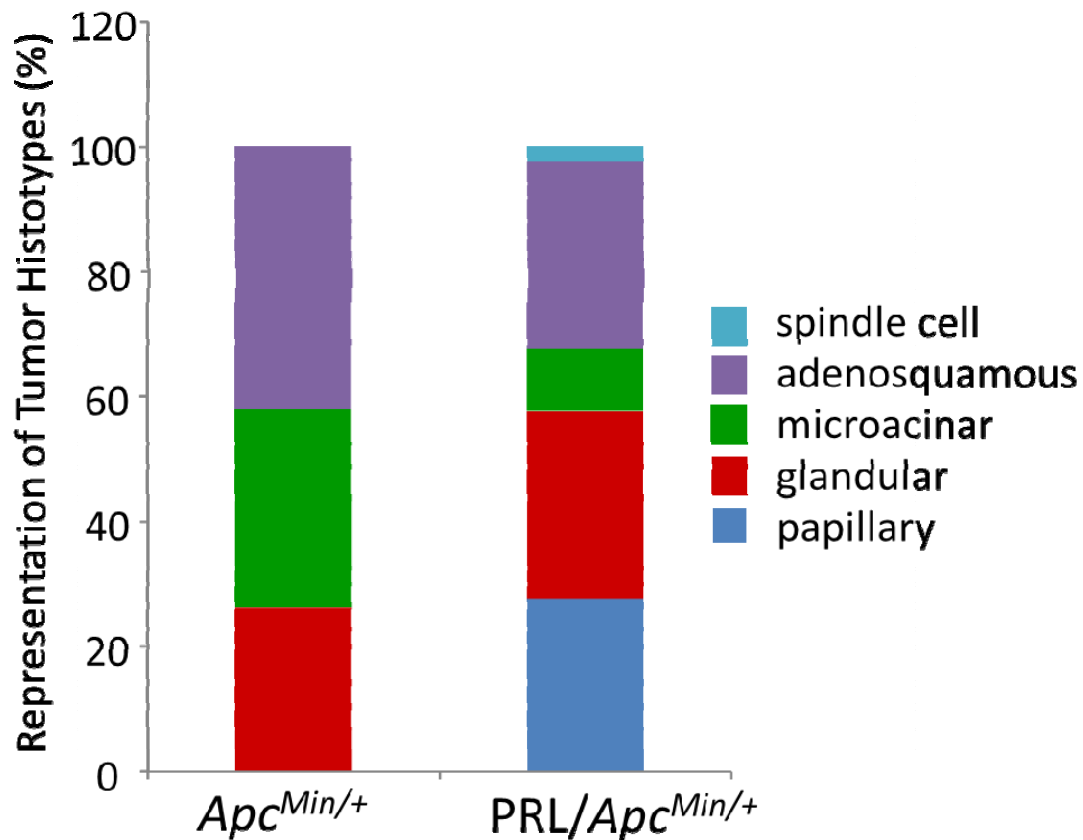

**Suppl. Fig. S2. Tumors that develop in *Apc*<sup>Min/+</sup> and NRL-PRL/*Apc*<sup>Min/+</sup> females exhibit similar spectra of histotypes, except that papillary carcinomas develop only in the presence of PRL. N= 19 tumors in *Apc*<sup>Min/+</sup> females; N=40 tumors in NRL-PRL/*Apc*<sup>Min/+</sup> females. Tumors in NRL-PRL females are not shown because of the low number of tumors (2 x papillary, 1 glandular. N=3).**

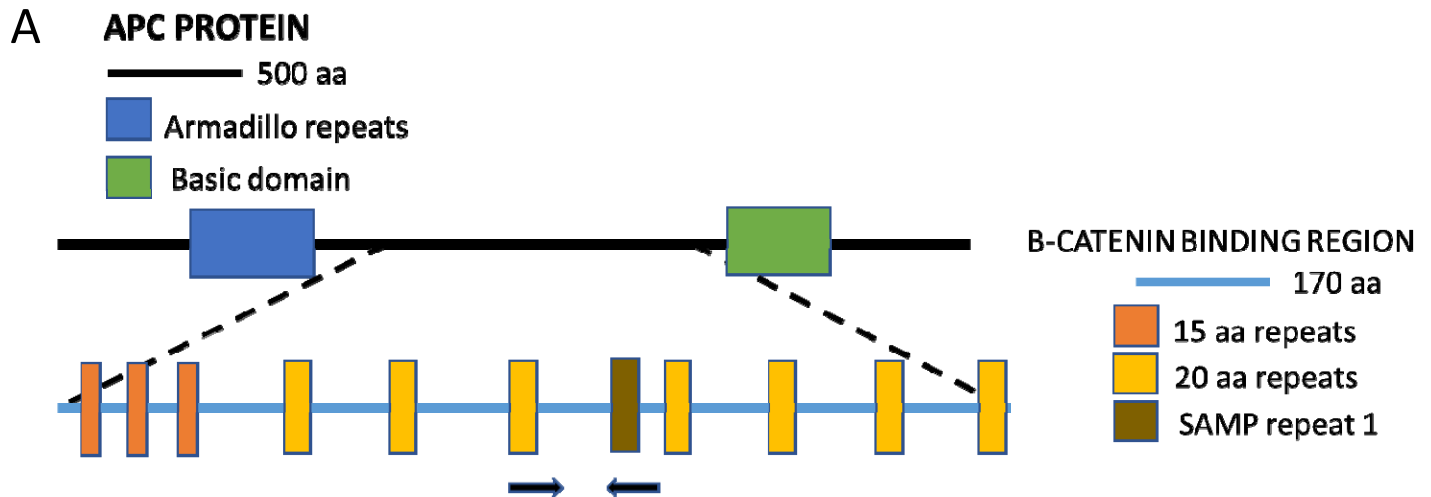

**B**

| Mutation               | <i>Apc</i> <sup>Min/+</sup> | PRL/ <i>Apc</i> <sup>Min/+</sup> | Histotype                               |
|------------------------|-----------------------------|----------------------------------|-----------------------------------------|
| None                   |                             | 4                                | adenosquamous, papillary, 2 x glandular |
| AA1512 (G/T)AG         |                             | 1                                | adenosquamous                           |
| AA1516 (C/T)AG         |                             | 2                                | 2 x adenosquamous                       |
| AA1521 T(T/A)A         |                             | 1                                | papillary                               |
| AA1521 T(T/G)A         |                             | 3                                | adenosquamous, 2 x glandular            |
| AA1528 (C/T)AG         | 1                           |                                  | adenosquamous                           |
| AA1529 (G/T)AA         | 1                           |                                  | adenosquamous                           |
| AA1531 <b>GGAC</b>     |                             | 1                                | glandular                               |
| AA1539 (G/T)AA         | 1                           | 1                                | 2 x glandular                           |
| AA1540 (C/T)AG         | 1                           | 2                                | adenosquamous, 2 x papillary            |
| AA1548 (C/T)AG         |                             | 1                                | glandular                               |
| AA1561 T(T/A)A         | 1                           |                                  | adenosquamous                           |
| AA1562 T(T/G)A         | 1                           |                                  | microacinar                             |
| AA1568 <del>GAT</del>  | 1                           | 1                                | glandular, adenoquamous                 |
| AA1569 <del>GAT</del>  | 1                           |                                  | adenosquamous                           |
| AA1576 TG(T/A)         | 1                           |                                  | glandular                               |
| <b>TOTAL</b>           | 9/9 (100.0%)                | 13/17 (76.5%)                    |                                         |
| #/ total #(percentage) |                             |                                  |                                         |

⚭-strikethrough: deletion

**NN** bold: insertion

**Suppl. Fig. S3. Tumors in PRL/ *Apc*<sup>Min/+</sup> and *Apc*<sup>Min/+</sup> females acquire a somatic mutation in the second *Apc* allele.** (A) Diagram of the APC protein. Expanded area,  $\beta$ -catenin binding region. Arrows indicate the region where somatic mutations cluster in mammary tumors in mutant *Apc* models (Kuraguchi et al., 2009; Keller et al., 2016). This region was sequenced in a subset of tumors in this study. aa, amino acids. (B) Somatic mutations detected in tumors in this region of the *Apc* gene in *Apc*<sup>Min/+</sup> and NRL-PRL-*Apc*<sup>Min/+</sup> ENU-treated females.

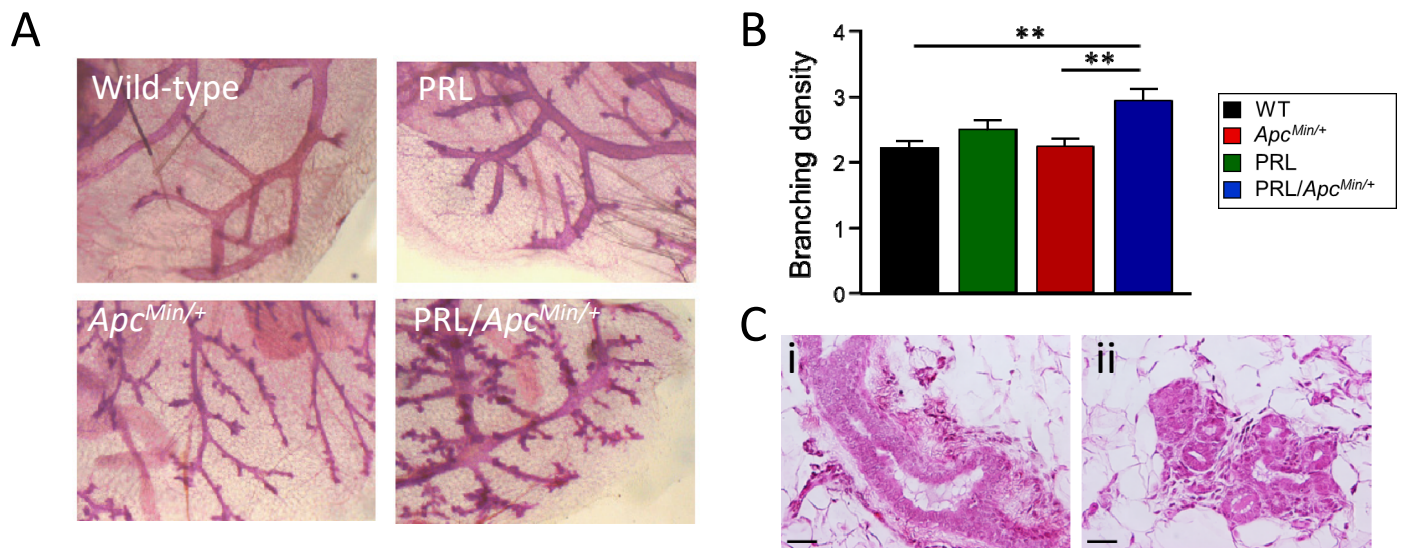

**D** Incidence of microscopic mammary abnormalities in 120 d.o. ENU-treated females<sup>a</sup>

|                                                | WT    | <i>Apc<sup>Min/+</sup></i> | NRL-PRL | NRL-PRL/ <i>Apc<sup>Min/+</sup></i> |
|------------------------------------------------|-------|----------------------------|---------|-------------------------------------|
| Focal Irregular ductal epithelium <sup>b</sup> | (0/7) | (5/7)                      | (2/6)   | (5/6)                               |
| Focal epithelial hyperplasias                  |       |                            |         |                                     |
| Small <sup>c</sup>                             | (2/7) | (7/7)                      | (6/6)   | (6/6)                               |
| Large <sup>d</sup>                             | (0/7) | (7/7)                      | (0/6)   | (6/6)                               |
| Squamous changes <sup>e</sup>                  | (0/7) | (6/7)                      | (0/6)   | (5/6)                               |

<sup>a</sup>Number of mice exhibiting lesions/ total number of mice examined in H&E stained sections.

<sup>b</sup>Illustrated in Fig. S4CI

<sup>c</sup>Small epithelial hyperplasias were defined as structures with 5-20 lumens, each surrounded by cuboidal epithelial cells (illustrated in Fig. S4CII).

<sup>d</sup>Large epithelial hyperplasias were defined as structures with more than 20 lumens, each surrounded by cuboidal epithelial cells (illustrated in Fig. 4A)

<sup>e</sup>Illustrated in Fig. 4A.

**Suppl. Fig. S4. PRL influences epithelial structures in 120 d.o. ENU-treated females, but in the absence of *Apc<sup>Min/+</sup>*, few mammary abnormalities are observed.** (A) PRL cooperates with *Apc<sup>Min/+</sup>* to increase ductal branching. Representative mammary whole mounts, stained with carmine alum. (B) Quantitation of ductal branching (mean ± S.E.M. \*\*,  $p < 0.01$ ;  $N = 4-7$ ). (C) Image of (i) irregular ductal epithelium; and (ii) small epithelial hyperplasia (Hematoxylin/eosin stain). Scale bars, 100  $\mu\text{m}$ . Original magnifications,  $\times 200$ . (D) Incidence of microscopic mammary abnormalities.

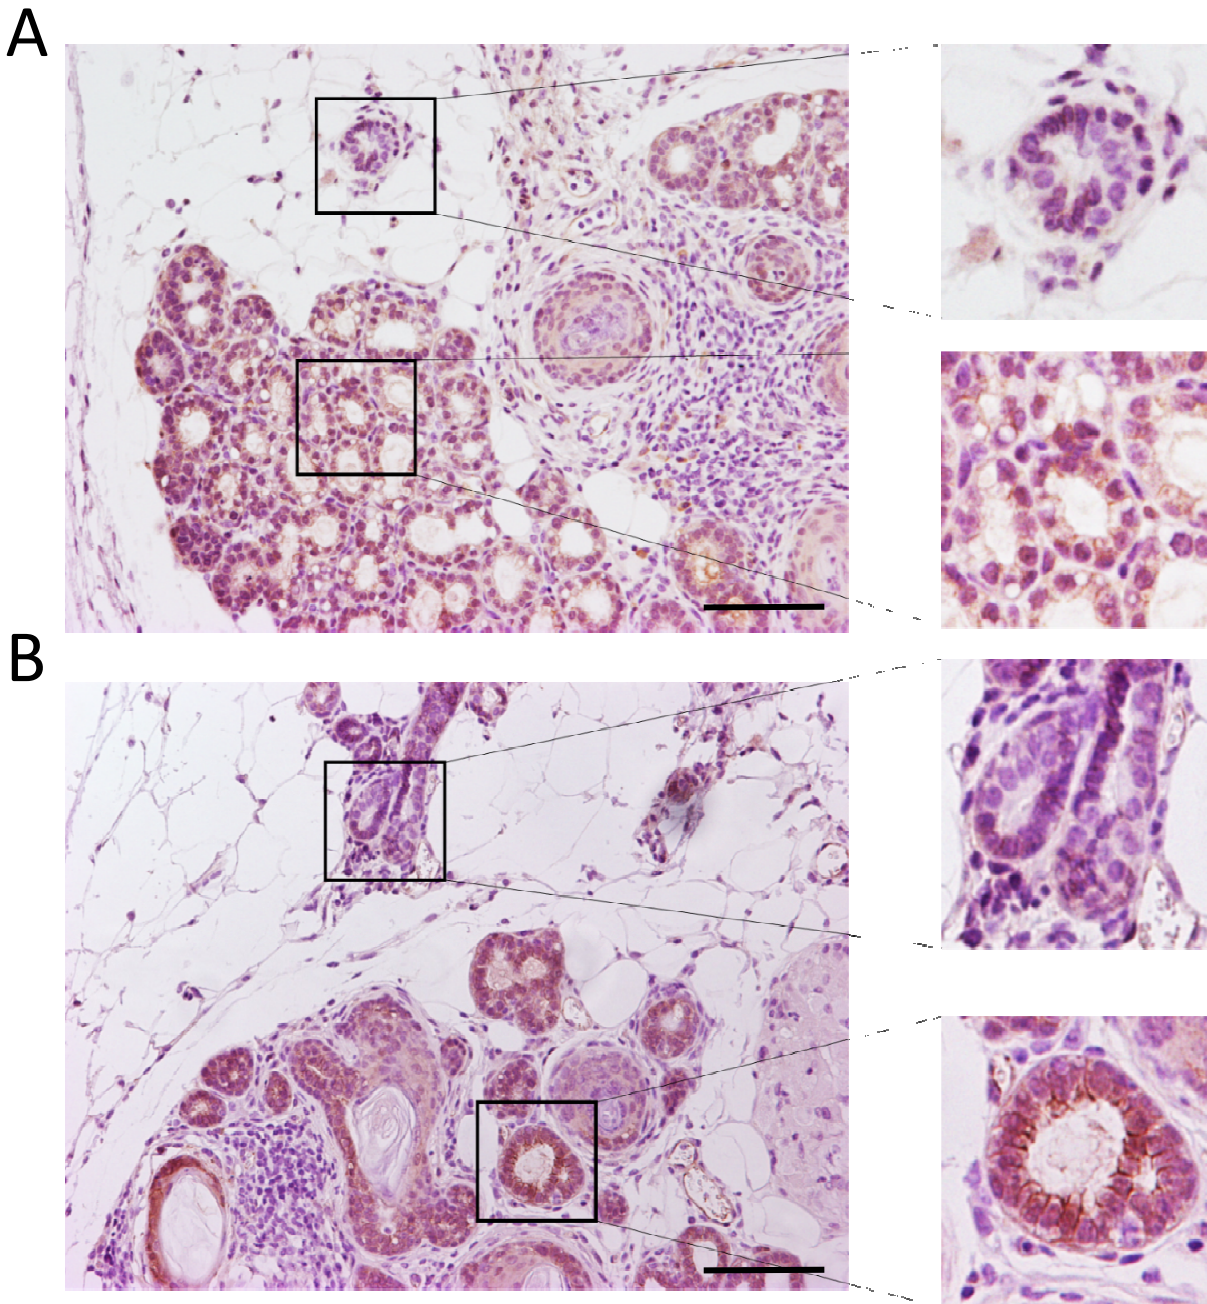

**Suppl. Fig. S5. Ductal luminal epithelium does not accumulate  $\beta$ -catenin in either *Apc<sup>Min/+</sup>* or NRL-PRL/*Apc<sup>Min/+</sup>* 120 d.o. ENU-treated females.** (A) Large epithelial hyperplasias in mammary glands of ENU-treated *Apc<sup>Min/+</sup>* females exhibited abundant nuclear  $\beta$ -catenin, which was not evident in ductal structures. (B) Epithelial hyperplasias in mammary glands of ENU-treated NRL-PRL *Apc<sup>Min/+</sup>* females exhibited abundant  $\beta$ -catenin at the plasma membrane, which was not evident in ductal structures. (A,B) Upper right insets, ductal structures; lower insets, epithelial hyperplasias. Scale bar, 500  $\mu$ m. Original magnifications, x100.

**A** *Apc*<sup>Min/+</sup>

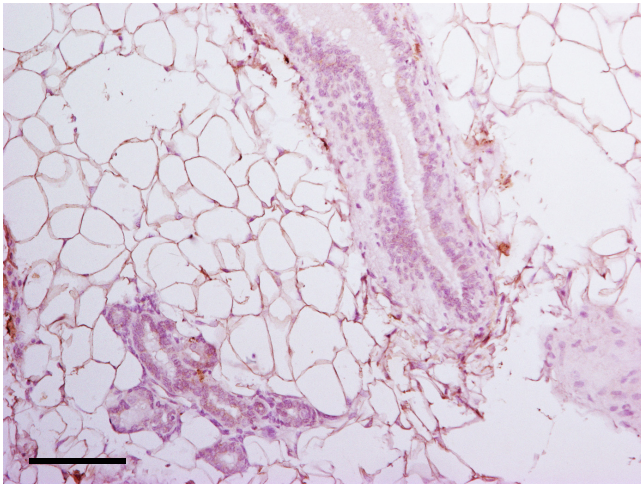

**B** NRL-PRL/*Apc*<sup>Min/+</sup>

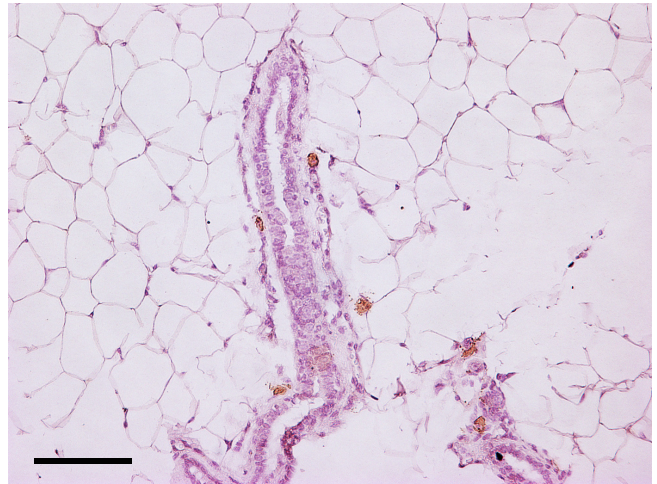

**Suppl. Fig. S6. Ductal luminal epithelium expresses little NOTCH1 in either *Apc*<sup>Min/+</sup> or NRL-PRL/*Apc*<sup>Min/+</sup> 120 d.o. ENU-treated females. (A) Mammary gland from *Apc*<sup>Min/+</sup> female. (B) Mammary gland from NRL-PRL/*Apc*<sup>Min/+</sup> female. Scale bar, 500  $\mu$ m. Original magnifications, x100.**
